# Supplementary material for: Alpha-Synuclein defects autophagy by impairing SNAP29-mediated autophagosome-lysosome fusion
Source: PubMed Central journal article supplement (PMC8448865; doi:10.1038/s41419-021-04138-0), 2021-09-17
Supplement: 41419_2021_4138_MOESM3_ESM.pdf [file 41419_2021_4138_MOESM3_ESM.pdf]

Please complete the table below to indicate the contributions of all named authors to the figures.

Figure 1:

|  |
|--|
|  |
|--|

Figure 2:

|  |
|--|
|  |
|--|

Figure 3:

|  |
|--|
|  |
|--|

Figure 4:

|  |
|--|
|  |
|--|

Figure 5:

|  |
|--|
|  |
|--|

Figure 6:

|  |
|--|
|  |
|--|

Signed for and on behalf of the Author(s):



Print Name:

Date:
